# Supplementary material
Source: publisher figshare collection journal article supplement (https://tandf.figshare.com/ndownloader/files/22813190)
Supplement: Supplementary file 1 [file 22813190]

**Preliminary study testing the effects of tea and coffee on sludge characteristics and N-butyryl-L-homoserine lactone in an MBR system**

Nouha Bakaraki Turan1*, Dotse Selali Chormey2, Hanife Sari Erkan1, Abdulkadir Cağlak1, Merve Saral1, Sezgin Bakirdere2, Guleda Onkal Engin1

*1Yildiz Technical University, Faculty of Civil Engineering, Department of Environmental Engineering, 34220 Davutpasa, Esenler, Istanbul, Turkey*

*2Yildiz Technical University, Faculty of Art and Science, Department of Chemistry, 34220 Davutpasa, Esenler, Istanbul, Turkey*

| **(a)**   | |
| --- | --- |
| **(b) ** | **(c) ** |
| **(d) ** | **(e)**  **** |
| **(f) ** | **(g)** **** |

**Figure S1.** SEM profiles of hollow fiber membranes used in different MBR operations, (a) Fresh hollow fiber membrane (b) Membrane from sMBRc1 (c) Membrane from sMBRc2 (d) Membrane from sMBR1 (e) Membrane from sMBR2 (f) Membrane from sMBR3 (g) Membrane from sMBRc4.
